# Supplementary material
Source: publisher figshare collection journal article supplement (https://acs.figshare.com/ndownloader/files/4144900)
Supplement: Supplementary file 1 [file 4144900]

## Supporting Figures

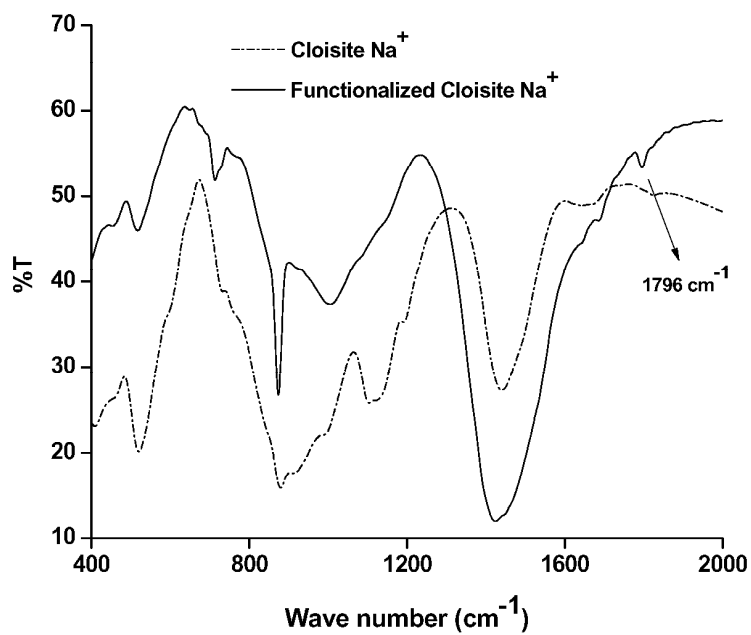

**Figure S1:** FT-IR spectra of Cloisite Na<sup>+</sup> and functionalized Cloisite Na<sup>+</sup>

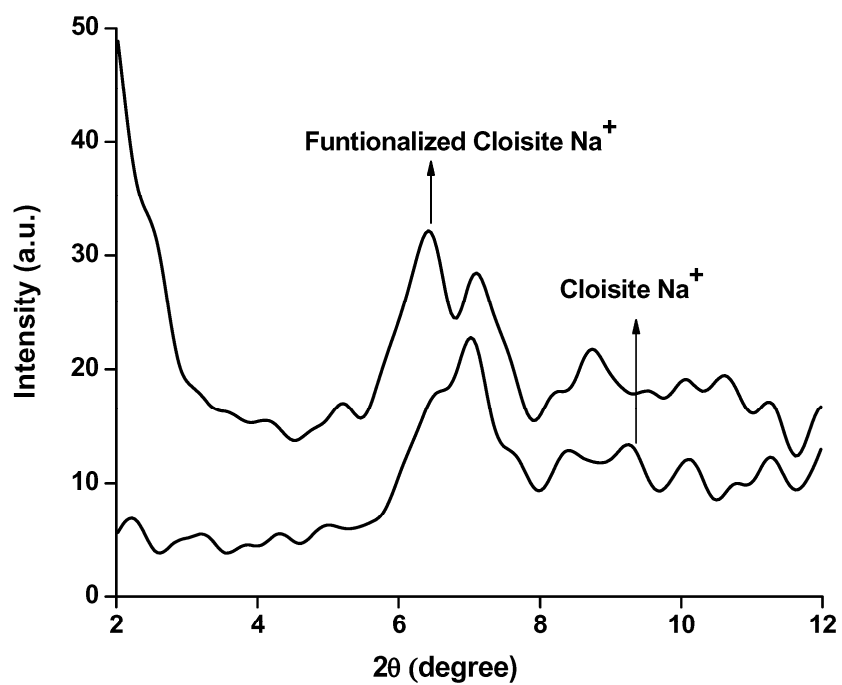

**Figure S2:** Low angle XRD patterns of Cloisite Na<sup>+</sup> and functionalized Cloisite Na<sup>+</sup>.

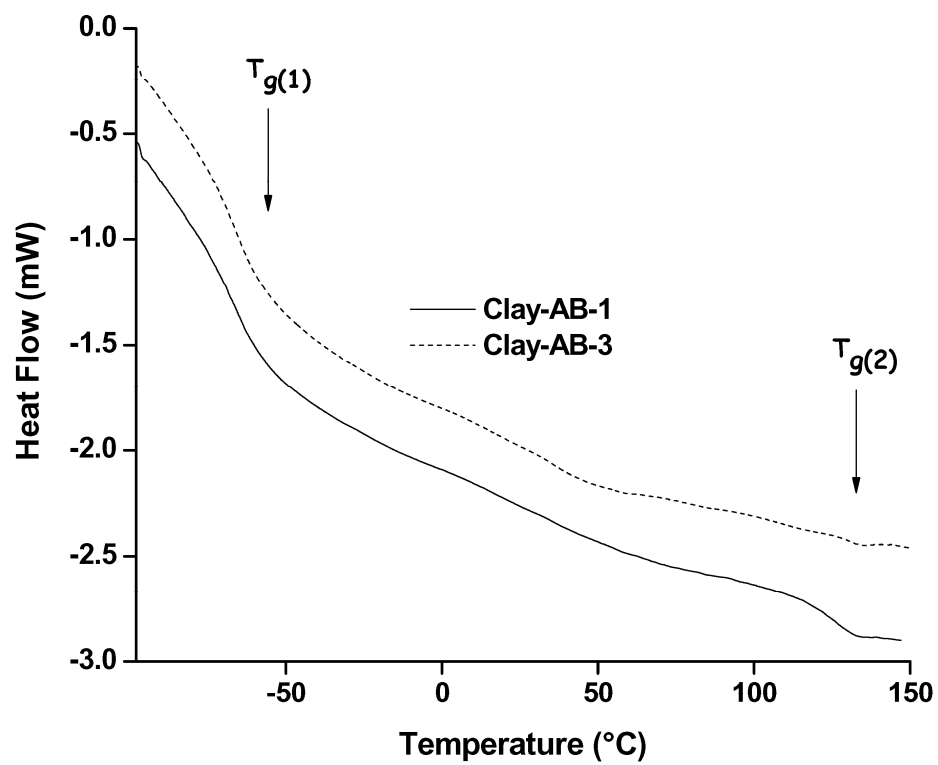

**Figure S3:** DSC traces of block copolymer/clay nanocomposites
